# Supplementary material for: Copy number variation detection using next generation sequencing read counts
Source: PubMed Central journal article supplement (PMC4021345; doi:10.1186/1471-2105-15-109), 2014-04-14
Supplement: 1471-2105-15-109-S1.pdf [file 1471-2105-15-109-S1.pdf]

# Additional file 1: Appendix 1

## More Details in the EM Algorithm

The EM algorithm is an iterative procedure to find the parameter value  $\boldsymbol{\theta}$  that maximizes the likelihood function  $\mathcal{L}(\boldsymbol{\theta}|\mathbf{u})$ . The observed data likelihood function is

$$\mathcal{L}_{(\text{obs})} = \mathcal{L}(\boldsymbol{\theta}|\mathbf{u}) = \sum_{\mathbf{s}} \pi_{s_1} \prod_{w=1}^{W-1} a_{s_w s_{w+1}}(w) \prod_{w=1}^W P(\mathbf{u}_w | \mathbf{s}, \alpha, \beta, c_0, \mathbf{q}, \mathbf{v}).$$

The complete data likelihood function is

$$\mathcal{L}_{(\text{comp})} = \mathcal{L}(\boldsymbol{\theta}|\mathbf{u}, \mathbf{s}) = \pi_{s_1} \prod_{w=1}^{W-1} a_{s_w s_{w+1}}(w) \prod_{w=1}^W P(\mathbf{u}_w | \mathbf{s}, \alpha, \beta, c_0, \mathbf{q}, \mathbf{v}).$$

1. The E step:

The E step is to evaluate the expectation of the complete data log-likelihood with respect to the conditional distribution of the hidden states  $\mathbf{S}$ , given the observation  $\mathbf{u}$ , and assuming the parameter vector  $\boldsymbol{\theta}$  is equal to  $\boldsymbol{\theta}^{(m)}$ , the value of  $\boldsymbol{\theta}$  determined in iteration  $m$  of the algorithm:  $E_{\mathbf{S}|\mathbf{u}, \boldsymbol{\theta}^{(m)}}(\ell(\boldsymbol{\theta}|\mathbf{u}, \mathbf{s}))$ , where  $\ell$  is an abbreviation for  $\log \mathcal{L}$ .

The expectation with respect to the conditional probability of the hidden states, given the observations  $\mathbf{u}$  and the parameters  $\boldsymbol{\theta}^{(m)}$  obtained from the  $m^{\text{th}}$  iter-

ation is

$$\begin{aligned}
& E_{\mathcal{S}|\mathbf{u},\boldsymbol{\theta}^{(m)}}(\ell(\boldsymbol{\theta}|\mathbf{u}, \mathbf{s})) \\
&= \sum_{\mathbf{s}} P(\mathcal{S} = \mathbf{s}|\mathbf{u}, \boldsymbol{\theta}^{(m)}) \left[ \log \pi_{s_1} + \sum_{w=1}^{W-1} \log (a_{s_w s_{w+1}}(w)) + \sum_{w=1}^W \log P(\mathbf{u}_w|\mathbf{s}, \alpha, \beta, c_0, \mathbf{q}, \mathbf{v}) \right] \\
&= \sum_{\mathbf{s}} P(\mathcal{S} = \mathbf{s}|\mathbf{u}, \boldsymbol{\theta}^{(m)}) \log \pi_{s_1} \tag{1}
\end{aligned}$$

$$+ \sum_{\mathbf{s}} P(\mathcal{S} = \mathbf{s}|\mathbf{u}, \boldsymbol{\theta}^{(m)}) \sum_{w=1}^{W-1} \log (a_{s_w s_{w+1}}(w)) \tag{2}$$

$$+ \sum_{\mathbf{s}} P(\mathcal{S} = \mathbf{s}|\mathbf{u}, \boldsymbol{\theta}^{(m)}) \sum_{w=1}^W \log P(\mathbf{u}_w|\mathbf{s}, \alpha, \beta, c_0, \mathbf{q}, \mathbf{v}) \tag{3}$$

$$\begin{aligned}
&= \sum_{k=1}^4 P_k(1) \log(\pi_k) + \sum_{w=1}^{W-1} \sum_{k=1}^4 \sum_{l=1}^4 P_{kl}(w) \log(a_{kl}(w)) \\
&+ \sum_{w=1}^W \sum_{k=1}^4 P_k(w) \log P(\mathbf{u}_w|\mathcal{S}_w = k, \alpha, \beta, c_0, \mathbf{q}, \mathbf{v}),
\end{aligned}$$

where  $P_k(w) = P(S_w = k|\mathbf{u}, \boldsymbol{\theta}^{(m)})$ ,  $P_{kl}(w) = P(S_w = k, S_{w+1} = l|\mathbf{u}, \boldsymbol{\theta}^{(m)})$  at the  $m^{\text{th}}$  iteration, and the equality following (3) can be demonstrated as follows.

First, note that expression (1) reduces to

$$\begin{aligned}
& \sum_{\mathbf{s}} \sum_{k=1}^4 P(\mathcal{S} = \mathbf{s}|\mathbf{u}, \boldsymbol{\theta}) \mathbb{I}_{\{S_1=k\}} \log(\pi_k) \\
&= \sum_{k=1}^4 \sum_{\mathbf{s}} P(\mathcal{S} = \mathbf{s}|\mathbf{u}, \boldsymbol{\theta}) \mathbb{I}_{\{S_1=k\}} \log(\pi_k) \\
&= \sum_{k=1}^4 P_k(1) \log(\pi_k),
\end{aligned}$$

We omit the superscript ( $m$ ) here for simplicity. Also we omit ( $m$ ) through the end of the E-step description. But the probabilities that appear here do depend on the current  $\boldsymbol{\theta}$  value and change with iterations.

Next, (2) may be simplified as

$$\begin{aligned}
& \sum_{\mathbf{s}} P(\mathbf{S} = \mathbf{s} | \mathbf{u}, \boldsymbol{\theta}) \sum_{w=1}^{W-1} \log(a_{s_w s_{w+1}}(w)) \\
&= \sum_{\mathbf{s}} P(\mathbf{S} = \mathbf{s} | \mathbf{u}, \boldsymbol{\theta}) \sum_{w=1}^{W-1} \sum_{k=1}^4 \sum_{l=1}^4 \mathbb{I}_{\{S_w=k\}} \mathbb{I}_{\{S_{w+1}=l\}} \log(a_{kl}(w)) \\
&= \sum_{w=1}^{W-1} \sum_{k=1}^4 \sum_{l=1}^4 \left[ \sum_{\mathbf{s}} P(\mathbf{S} = \mathbf{s} | \mathbf{u}, \boldsymbol{\theta}) \mathbb{I}_{\{S_w=k\}} \mathbb{I}_{\{S_{w+1}=l\}} \right] \log(a_{kl}(w)) \\
&= \sum_{w=1}^{W-1} \sum_{k=1}^4 \sum_{l=1}^4 P_{kl}(w) \log(a_{kl}(w)).
\end{aligned}$$

Finally, expression (3) may be written as

$$\begin{aligned}
& \sum_{\mathbf{s}} P(\mathbf{S} = \mathbf{s} | \mathbf{u}, \boldsymbol{\theta}) \sum_{w=1}^W \log P(\mathbf{u}_w | \mathbf{s}, \alpha, \beta, c_0, \mathbf{q}, \mathbf{v}) \\
&= \sum_{w=1}^W \sum_{k=1}^4 \sum_{\mathbf{s}} P(\mathbf{S} = \mathbf{s} | \mathbf{u}, \boldsymbol{\theta}) \mathbb{I}_{\{S_w=k\}} \log P(\mathbf{u}_w | S_w = k, \alpha, \beta, c_0, \mathbf{q}, \mathbf{v}) \\
&= \sum_{w=1}^W \sum_{k=1}^4 P_k(w) \log P(\mathbf{u}_w | S_w = k, \alpha, \beta, c_0, \mathbf{q}, \mathbf{v}).
\end{aligned}$$

The numeric values of  $P_k(w) = \frac{P(S_w=k, \mathbf{u} | \boldsymbol{\theta})}{P(\mathbf{u} | \boldsymbol{\theta})}$  and  $P_{kl}(w) = \frac{P(S_w=k, S_{w+1}=l, \mathbf{u} | \boldsymbol{\theta})}{P(\mathbf{u} | \boldsymbol{\theta})}$  can be evaluated using the forward-backward algorithm, which was introduced by Rabiner and Juang (1986). The forward probability  $f_k(w)$  is defined as the probability of having state  $k$  at window  $w$ , and having the observations  $\{\mathbf{u}_1, \dots, \mathbf{u}_w\}$  from window 1 to window  $w$ , given the parameter  $\boldsymbol{\theta}$ , i.e.,  $f_k(w) = P(\mathbf{u}_1, \dots, \mathbf{u}_w, S_w = k | \boldsymbol{\theta})$ . The backward probability  $b_k(w)$  is defined as the probability of having the observations  $\{\mathbf{u}_{w+1}, \dots, \mathbf{u}_W\}$  from window  $w+1$  to window  $W$ , given the state  $k$  at window  $w$ , the observations from window 1 to window  $w$ , and the parameter  $\boldsymbol{\theta}$ , i.e.,  $b_k(w) = P(\mathbf{u}_{w+1}, \dots, \mathbf{u}_W | S_w = k, \mathbf{u}_1, \dots, \mathbf{u}_w, \boldsymbol{\theta})$ . The forward and backward probabilities can be obtained using recursions:  $f_k(1) = \pi_k P(\mathbf{u}_1 | S_1 = k, \boldsymbol{\theta})$ ,  $b_k(W) = 1$ ,  $f_k(w) = \sum_{l=1}^4 f_l(w-1) a_{lk}(w-1) P(\mathbf{u}_w | S_w = k, \boldsymbol{\theta})$  for  $w = 2, \dots, W$ , and  $b_k(w) = \sum_{l=1}^4 a_{kl}(w) P(\mathbf{u}_{w+1} | S_{w+1} = l, \boldsymbol{\theta}) b_l(w+1)$  for  $w = W-1, \dots, 1$ .

Consequently,

$$\begin{aligned}
& P(S_w = k, \mathbf{u}|\boldsymbol{\theta}) \\
&= P(\mathbf{u}_1, \dots, \mathbf{u}_W, S_w = k|\boldsymbol{\theta}) \\
&= P(\mathbf{u}_1, \dots, \mathbf{u}_w, S_w = k|\boldsymbol{\theta})P(\mathbf{u}_{w+1}, \dots, \mathbf{u}_W|S_w = k, \mathbf{u}_1, \dots, \mathbf{u}_w, \boldsymbol{\theta}) \\
&= f_k(w)b_k(w),
\end{aligned}$$

and

$$\begin{aligned}
& P(S_w = k, S_{w+1} = l, \mathbf{u}|\boldsymbol{\theta}) \\
&= P(\mathbf{u}_1, \dots, \mathbf{u}_w, S_w = k|\boldsymbol{\theta}) \cdot P(\mathbf{u}_{w+1}, S_{w+1} = l|S_w = k, \mathbf{u}_1, \dots, \mathbf{u}_w, \boldsymbol{\theta}) \\
&\quad \cdot P(\mathbf{u}_{w+2}, \dots, \mathbf{u}_W|S_w = k, S_{w+1} = l, \mathbf{u}_1, \dots, \mathbf{u}_{w+1}, \boldsymbol{\theta}) \\
&= f_k(w)P(\mathbf{u}_{w+1}, S_{w+1} = l|S_w = k, \boldsymbol{\theta})b_l(w+1) \\
&= f_k(w)a_{kl}(w)P(\mathbf{u}_{w+1}|S_{w+1} = l, \boldsymbol{\theta})b_l(w+1).
\end{aligned}$$

2. The M step:

The M step of EM algorithm is to find the value of  $\boldsymbol{\theta}$  that makes  $E_{\mathbf{S}|\mathbf{u}, \boldsymbol{\theta}^{(m)}}(\ell(\boldsymbol{\theta}|\mathbf{u}, \mathbf{s}))$  obtain the maximum. This maximizing value is the updated parameter  $\boldsymbol{\theta}^{(m+1)}$  for the  $(m+1)^{\text{th}}$  iteration.

$$\begin{aligned}
& E_{\mathbf{S}|\mathbf{u},\boldsymbol{\theta}^{(m)}}(\ell(\boldsymbol{\theta}|\mathbf{u}, \mathbf{s})) \\
&= \sum_{\mathbf{s}} P(\mathbf{S}|\mathbf{u}, \boldsymbol{\theta}) \left[ \log \pi_{s_1} + \sum_{w=1}^{W-1} \log (a_{s_w s_{w+1}}(w)) + \sum_{w=1}^W \log P(\mathbf{u}_w|\mathbf{s}, \alpha, \beta, c_0, \mathbf{q}, \mathbf{v}) \right] \\
&= \sum_{k=1}^4 P_k(1) \log(\pi_k) + \sum_{w=1}^{W-1} \sum_{k=1}^4 \sum_{l=1}^4 P_{kl}(w) \log(a_{kl}(w)) \\
&\quad + \sum_{w=1}^W \sum_{k=1}^4 P_k(w) \log P(\mathbf{u}_w|S_w = k, \alpha, \beta, c_0, \mathbf{q}, \mathbf{v}) \\
&= \sum_{k=1}^4 P_k(1) \log(\pi_k) + \sum_{w=1}^{W-1} \sum_{k=1}^4 P_{kk}(w) \log \left( 1 - \left( \sum_{l' \neq k} p_{kl'} \right) (1 - e^{-\rho d_w}) \right) \\
&\quad + \sum_{w=1}^{W-1} \sum_{k=1}^4 \sum_{l \neq k} P_{kl}(w) \log \left( p_{kl} (1 - e^{-\rho d_w}) \right) \\
&\quad + \sum_{w=1}^W \sum_{k=1}^4 P_k(w) \log P(\mathbf{u}_w|S_w = k, \alpha, \beta, c_0, \mathbf{q}, \mathbf{v}) \\
&\triangleq G_1(\pi_k) + G_2(\mathbf{p}, \rho) + G_3(\mathbf{p}, \rho) + G_4(\mathbf{s}, \alpha, \beta, c_0, \mathbf{q}, \mathbf{v}).
\end{aligned}$$

Equating to zero the derivative of  $E_{\mathbf{S}|\mathbf{u},\boldsymbol{\theta}^{(m)}}(\ell(\boldsymbol{\theta}|\mathbf{u}, \mathbf{s}))$  with respect to  $p_{kl}$  yields

$$\begin{aligned}
& \frac{\partial G_2(\mathbf{p}, \rho)}{\partial p_{kl}} + \frac{\partial G_3(\mathbf{p}, \rho)}{\partial p_{kl}} \triangleq 0 \quad (k, l = 1, \dots, 4; l \neq k) \\
\Rightarrow & \sum_{w=1}^{W-1} \frac{(1 - e^{-\rho d_w}) P_{kk}(w)}{1 - (1 - e^{-\rho d_w}) \sum_{l' \neq k} p_{kl'}} = \sum_{w=1}^{W-1} \frac{P_{kl}(w)}{p_{kl}} \quad (k, l = 1, \dots, 4; l \neq k) \\
\Rightarrow & \sum_{w=1}^{W-1} \frac{P_{k1}(w)}{p_{k1}} = \dots = \sum_{w=1}^{W-1} \frac{P_{k4}(w)}{p_{k4}} = \sum_{w=1}^{W-1} \frac{(1 - e^{-\rho d_w}) P_{kk}(w)}{1 - (1 - e^{-\rho d_w}) \sum_{l' \neq k} p_{kl'}}
\end{aligned}$$

for  $k, l = 1, \dots, 4$  and  $l \neq k$ .

Letting  $\sum_{w=1}^{W-1} \frac{P_{kl}(w)}{p_{kl}} = h_k$ ,  $k = 1, \dots, 4$ , we find the value of  $h_k$  that maximizes

$$\begin{aligned}
& \sum_{w=1}^{W-1} P_{kk}(w) \log \left( 1 - \left( \frac{\sum_{l' \neq k} \sum_{w=1}^{W-1} P_{kl'}(w)}{h_k} \right) (1 - e^{-\rho d_w}) \right) \\
& \quad + \sum_{w=1}^{W-1} \sum_{l \neq k} P_{kl}(w) \log \left( \frac{\sum_{w=1}^{W-1} P_{kl}(w)}{h_k} (1 - e^{-\rho d_w}) \right)
\end{aligned}$$

for each  $k$  with  $\rho$  initially fixed at its value from the previous EM iteration ( $\rho^{(m)}$ ).

Then a new  $\mathbf{p}$  value can be obtained by  $p_{kl}(w) = \frac{\sum_{w=1}^{W-1} P_{kl}(w)}{h_k}$ ,  $k, l = 1, \dots, 4$ ,

$l \neq k$ . Now, an updated value of  $\rho$  can be obtained by directly maximizing  $G_2(\mathbf{p}, \rho) + G_3(\mathbf{p}, \rho)$  with respect to  $\rho$ , using the new  $\mathbf{p}$  value.

After obtaining a pair of values of  $\mathbf{p}$  and  $\rho$  that maximize  $G_2(\mathbf{p}, \rho) + G_3(\mathbf{p}, \rho)$ , we estimate the values for  $\alpha, \beta, \mathbf{q}$  and  $\mathbf{v}$  by maximizing  $G_4$ . EM iteration continues until all parameter values getting converge, at which point we obtain an updated  $\boldsymbol{\theta}^{(m+1)}$  value.

## Derivation for Equation (4)

Here we provide a detailed derivation for equation (4). Conditional on the hidden copy number state for window  $w$ , the joint distribution for the target and the reference read counts at window  $w$  is

$$\begin{aligned}
P^{(*)}(U_w^{[t]} = u_w^{[t]}, U_w^{[r]} = u_w^{[r]} | S_w = k, \boldsymbol{\theta}) & \\
&= \int_0^\infty P(U_w^{[t]} = u_w^{[t]}, U_w^{[r]} = u_w^{[r]}, \lambda_w^{[r]} | S_w = k, \boldsymbol{\theta}) d\lambda_w^{[r]} \\
&= \int_0^\infty P(U_w^{[t]} = u_w^{[t]}, U_w^{[r]} = u_w^{[r]} | \lambda_w^{[r]}, S_w = k, \boldsymbol{\theta}) P(\lambda_w^{[r]} | S_w = k) d\lambda_w^{[r]} \\
&= \int_0^\infty P(U_w^{[t]} = u_w^{[t]} | \lambda_w^{[r]}, S_w = k, \boldsymbol{\theta}) P(U_w^{[r]} = u_w^{[r]} | \lambda_w^{[r]}, S_w = k, \boldsymbol{\theta}) P(\lambda_w^{[r]} | S_w = k) d\lambda_w^{[r]}
\end{aligned}$$

According to (3),

$$U_w^{[t]} | (\lambda_w^{[r]}, S_w = k) \sim \sum_{j=1}^4 q_{kj} \text{Poisson}(v_{kj} c_0 \lambda_w^{[r]}),$$

we have

$$\begin{aligned}
P(U_w^{[t]} = u_w^{[t]} | \lambda_w^{[r]}, S_w = k, \boldsymbol{\theta}) & \\
&= \sum_{j=1}^4 q_{kj} \frac{(v_{kj} c_0 \lambda_w^{[r]})^{u_w^{[t]}} e^{-v_{kj} c_0 \lambda_w^{[r]}}}{u_w^{[t]}!}
\end{aligned}$$

So

$$\begin{aligned}
& P^{(*)}(U_w^{[t]} = u_w^{[t]}, U_w^{[r]} = u_w^{[r]} | S_w = k, \boldsymbol{\theta}) \\
&= \sum_{j=1}^4 q_{kj} \int_0^\infty \frac{(v_{kj}c_0\lambda_w^{[r]})^{u_w^{[t]}} e^{-v_{kj}c_0\lambda_w^{[r]}}}{u_w^{[t]}!} \cdot \frac{(\lambda_w^{[r]})^{u_w^{[r]}} e^{-\lambda_w^{[r]}}}{u_w^{[r]}!} \cdot \frac{\beta^\alpha (\lambda_w^{[r]})^{\alpha-1} e^{-\beta\lambda_w^{[r]}}}{\Gamma(\alpha)} d\lambda_w^{[r]} \\
&= \sum_j q_{kj} \frac{\Gamma(u_w^{[t]} + u_w^{[r]} + \alpha)(v_{kj}c_0)^{u_w^{[t]}} \beta^\alpha}{\Gamma(\alpha) u_w^{[r]}! u_w^{[t]}! (v_{kj}c_0 + 1 + \beta)^{u_w^{[t]} + u_w^{[r]} + \alpha}} \\
&\quad \int_0^\infty \frac{(v_{kj}c_0 + 1 + \beta)^{u_w^{[t]} + u_w^{[r]} + \alpha} (\lambda_w^{[r]})^{u_w^{[r]} + u_w^{[t]} + \alpha - 1} e^{-(v_{kj}c_0 + \beta + 1)\lambda_w^{[r]}} \lambda_w^{[r]} d\lambda_w^{[r]}}{\Gamma(u_w^{[t]} + u_w^{[r]} + \alpha)}
\end{aligned}$$

The last integral is a integral of a Gamma distribution with parameters  $u_w^{[r]} + u_w^{[t]} + \alpha$  and  $v_{kj}c_0 + 1 + \beta$  so is equal to 1. Then we have

$$\begin{aligned}
& P^{(*)}(U_w^{[t]} = u_w^{[t]}, U_w^{[r]} = u_w^{[r]} | S_w = k, \boldsymbol{\theta}) \\
&= \sum_j q_{kj} \frac{\Gamma(u_w^{[t]} + u_w^{[r]} + \alpha)(v_{kj}c_0)^{u_w^{[t]}} \beta^\alpha}{\Gamma(\alpha) u_w^{[r]}! u_w^{[t]}! (v_{kj}c_0 + 1 + \beta)^{u_w^{[t]} + u_w^{[r]} + \alpha}},
\end{aligned}$$

which is equation (4).
