# Supplementary material for: Copy number variation detection using next generation sequencing read counts
Source: PubMed Central journal article supplement (PMC4021345; doi:10.1186/1471-2105-15-109), 2014-04-14

# Additional file 2: Appendix 2

## Maize CNV Detection Results

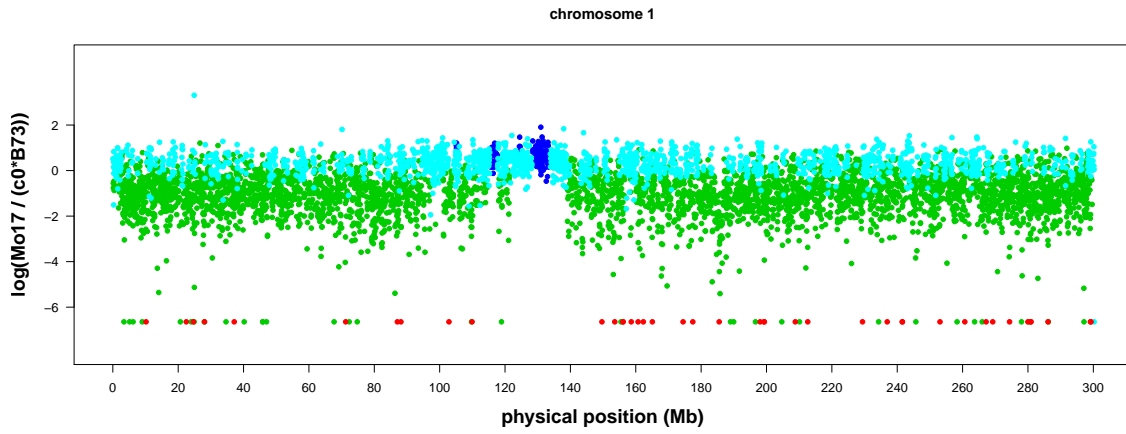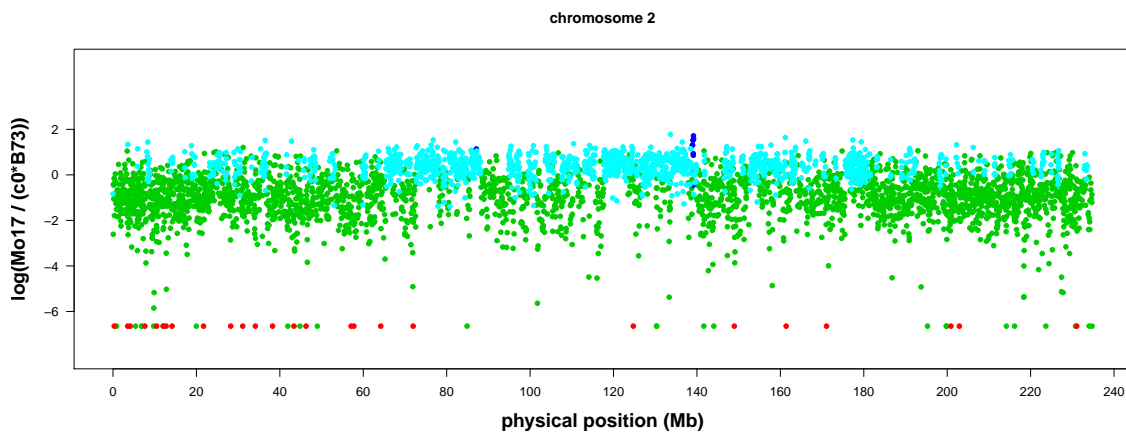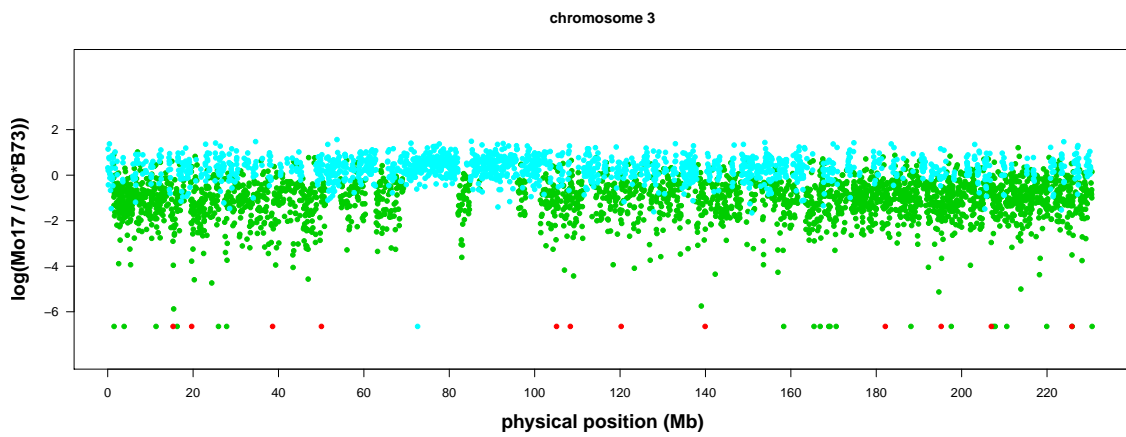

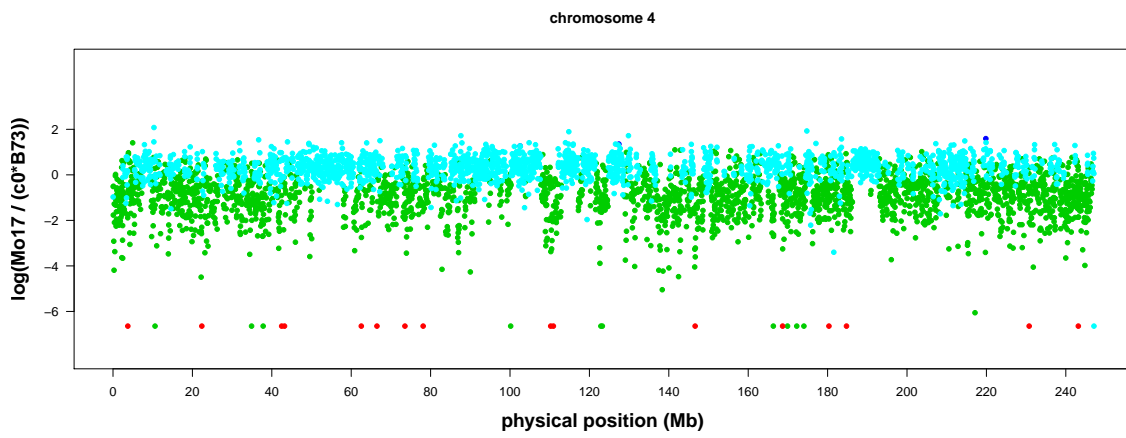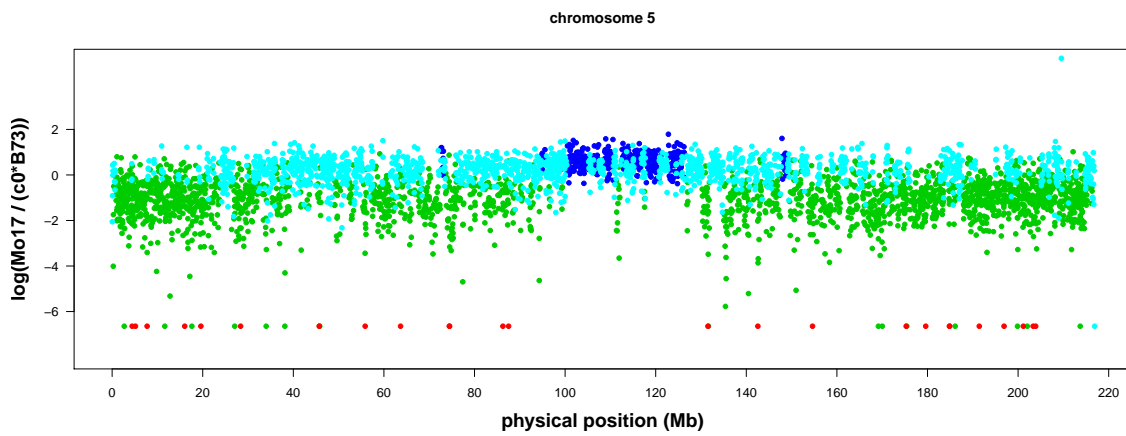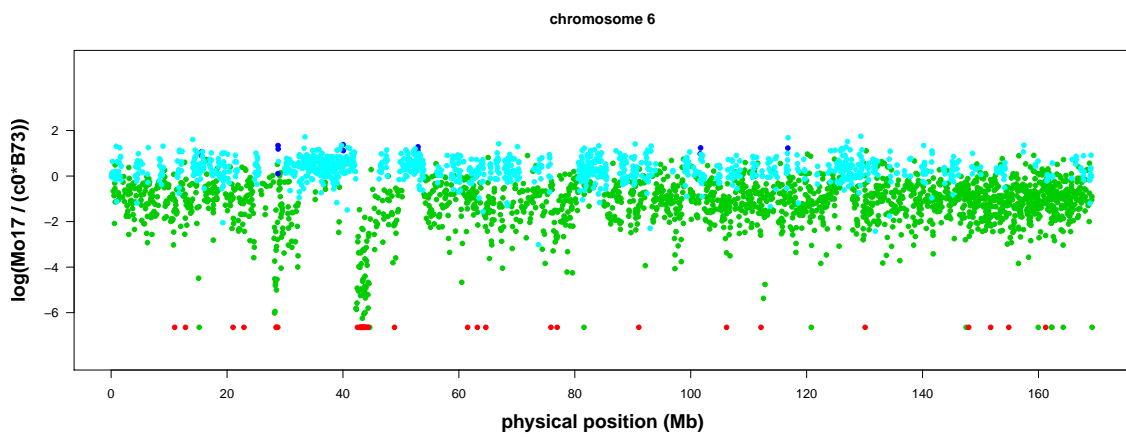

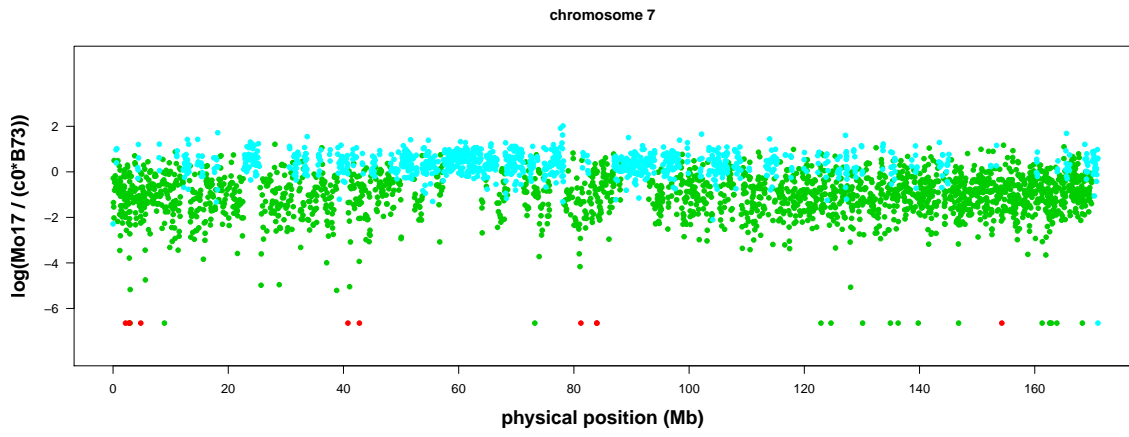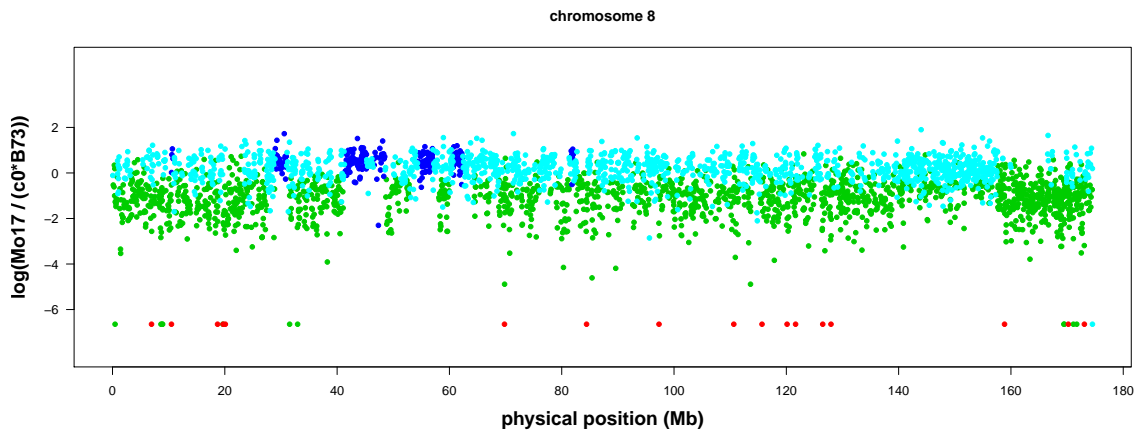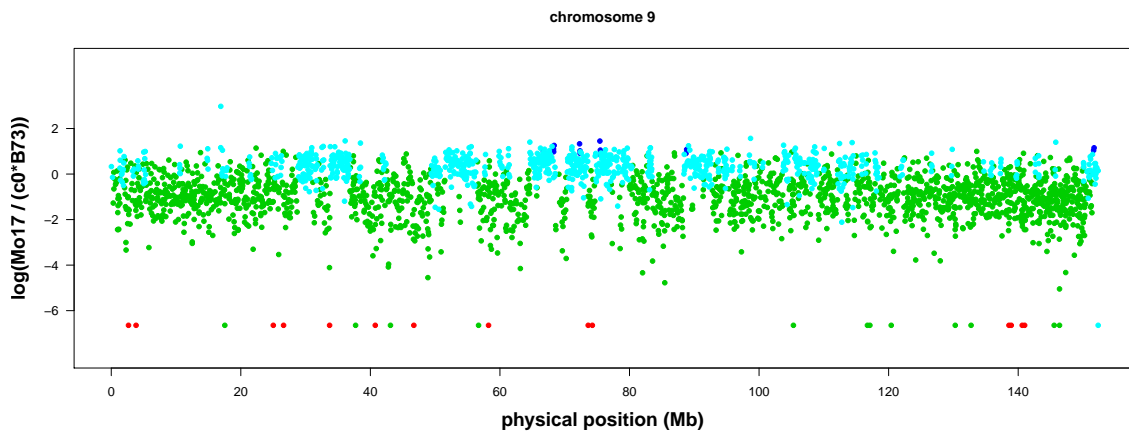

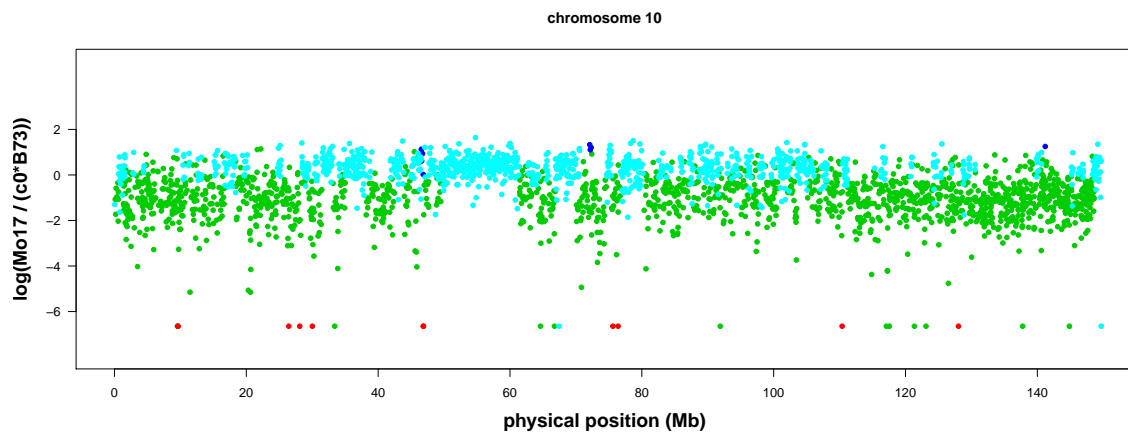

Supplement: 1471-2105-15-109-S2.pdf [file 1471-2105-15-109-S2.pdf]
